# Supplementary material
Source: PubMed Central journal article supplement (PMC3426718)
Supplement: AEM.01015-12_zam999103625so1.pdf [file AEM.01015-12_zam999103625so1.pdf]

TABLE S1 Complete list of genes dysregulated in *P. aeruginosa* H103 during growth in a phosphate-limiting (0.2 mM) medium compared to phosphate-sufficient (1 mM) conditions

| Gene ID | Gene name    | Fold change | p-value  | Description                                    |
|---------|--------------|-------------|----------|------------------------------------------------|
| PA0006  |              | -2.26       | 0.0188   | conserved hypothetical protein                 |
| PA0007  |              | 2.02        | 0.0002   | hypothetical protein                           |
| PA0008  | <i>glyS</i>  | -2.15       | 0.0031   | glycyl-tRNA synthetase beta chain              |
| PA0009  | <i>glyQ</i>  | -2.60       | 0.0005   | glycyl-tRNA synthetase alpha chain             |
| PA0024  | <i>hemF</i>  | -2.81       | 0.0001   | coproporphyrinogen III oxidase, aerobic        |
| PA0026  | <i>plcB</i>  | 2.40        | 0.0001   | phospholipase C                                |
| PA0027  |              | 2.21        | 0.0009   | hypothetical protein                           |
| PA0028  |              | 2.63        | 0.0003   | hypothetical protein                           |
| PA0035  | <i>trpA</i>  | -2.24       | 0.0015   | tryptophan synthase alpha chain                |
| PA0036  | <i>trpB</i>  | -2.40       | 0.0003   | tryptophan synthase beta chain                 |
| PA0038  |              | 3.89        | 0.0001   | hypothetical protein                           |
| PA0045  |              | -2.49       | 0.0001   | hypothetical protein                           |
| PA0047  |              | -3.10       | 0.0004   | hypothetical protein                           |
| PA0050  |              | 2.46        | 0.0022   | hypothetical protein                           |
| PA0059  | <i>osmC</i>  | 4.11        | 9.88E-05 | osmotically inducible protein OsmC             |
| PA0083  | <i>tssB1</i> | 4.00        | 4.11E-05 | type VI secretion system protein               |
| PA0084  | <i>tssC1</i> | 2.73        | 0.0001   | type VI secretion system protein               |
| PA0085  | <i>htp1</i>  | 5.37        | 0.0004   | type VI secretion system protein               |
| PA0087  | <i>tssE1</i> | 2.10        | 0.0009   | type VI secretion system protein               |
| PA0088  | <i>tssF1</i> | 3.10        | 5.98E-05 | type VI secretion system protein               |
| PA0089  | <i>tssG1</i> | 3.85        | 0.0007   | type VI secretion system protein               |
| PA0090  | <i>clpVI</i> | 4.96        | 0.0001   | type VI secretion system protein ATPase        |
| PA0091  | <i>vgrG1</i> | 4.25        | 0.0001   | type VI secretion system protein               |
| PA0098  |              | 2.14        | 0.0018   | hypothetical protein                           |
| PA0100  |              | 3.42        | 0.0022   | hypothetical protein                           |
| PA0101  |              | 3.46        | 0.0022   | hypothetical protein                           |
| PA0105  | <i>coxB</i>  | 3.93        | 0.0126   | cytochrome c oxidase, subunit II               |
| PA0106  | <i>coxA</i>  | 4.84        | 0.0129   | cytochrome c oxidase, subunit I                |
| PA0107  |              | 5.82        | 0.0003   | conserved hypothetical protein                 |
| PA0108  | <i>coIII</i> | 3.72        | 0.0012   | cytochrome c oxidase, subunit III              |
| PA0109  |              | 2.15        | 0.0001   | hypothetical protein                           |
| PA0110  |              | 2.73        | 0.001    | hypothetical protein                           |
| PA0111  |              | 2.50        | 0.0006   | hypothetical protein                           |
| PA0113  |              | 2.05        | 0.0018   | probable cytochrome c oxidase assembly factor  |
| PA0122  |              | 4.55        | 0.0141   | conserved hypothetical protein                 |
| PA0165  |              | -2.54       | 0.0012   | hypothetical protein                           |
| PA0169  |              | -2.11       | 0.0008   | hypothetical protein                           |
| PA0170  |              | -3.38       | 0.0003   | hypothetical protein                           |
| PA0173  |              | 5.58        | 0.0001   | probable chemotaxis-specific methyltransferase |
| PA0174  |              | 5.59        | 0.0003   | conserved hypothetical protein                 |
| PA0175  |              | 10.61       | 7.71E-05 | probable chemotaxis protein methyltransferase  |

|        |              |       |          |                                                                                     |
|--------|--------------|-------|----------|-------------------------------------------------------------------------------------|
| PA0176 | <i>aer2</i>  | 15.43 | 0.0001   | aerotaxis transducer                                                                |
| PA0177 |              | 9.10  | 6.68E-05 | probable purine-binding chemotaxis protein                                          |
| PA0178 |              | 4.89  | 0.0011   | probable two-component sensor                                                       |
| PA0179 |              | 4.03  | 0.0001   | probable two-component response regulator                                           |
| PA0188 |              | 2.34  | 0.0224   | hypothetical protein                                                                |
| PA0232 | <i>pcaC</i>  | 2.44  | 0.0003   | gamma-carboxymuconolactone decarboxylase                                            |
| PA0259 |              | 2.07  | 0.0017   | hypothetical protein                                                                |
| PA0260 |              | 2.31  | 0.0117   | hypothetical protein                                                                |
| PA0265 | <i>gabD</i>  | 2.93  | 0.0004   | succinate-semialdehyde dehydrogenase                                                |
| PA0266 | <i>gabT</i>  | 2.37  | 2.79E-05 | 4-aminobutyrate aminotransferase                                                    |
| PA0280 | <i>cysA</i>  | -2.04 | 0.0005   | sulfate transport protein CysA                                                      |
| PA0281 | <i>cysW</i>  | -4.07 | 0.0009   | sulfate transport protein CysW                                                      |
| PA0282 | <i>cysT</i>  | -3.02 | 0.0001   | sulfate transport protein CysT                                                      |
| PA0283 | <i>sbp</i>   | -3.63 | 3.05E-05 | sulfate-binding protein precursor                                                   |
| PA0284 |              | -3.05 | 0.0024   | hypothetical protein                                                                |
| PA0291 | <i>oprE</i>  | -3.75 | 3.18E-06 | Anaerobically-induced outer membrane porin<br>OprE precursor                        |
| PA0315 |              | 2.63  | 0.0053   | hypothetical protein                                                                |
| PA0316 | <i>serA</i>  | -2.88 | 0.0004   | D-3-phosphoglycerate dehydrogenase                                                  |
| PA0329 |              | 3.74  | 2.33E-05 | conserved hypothetical protein                                                      |
| PA0331 | <i>ilvAI</i> | -2.48 | 5.63E-05 | threonine dehydratase, biosynthetic<br>glycerophosphoryl diester phosphodiesterase, |
| PA0347 | <i>glpQ</i>  | 25.01 | 1.30E-07 | periplasmic                                                                         |
| PA0355 | <i>pfpI</i>  | 2.00  | 0.0143   | protease PfpI                                                                       |
| PA0380 |              | -2.40 | 3.52E-05 | conserved hypothetical protein                                                      |
| PA0381 | <i>thiG</i>  | -3.13 | 0.001    | thiamine biosynthesis protein, thiazole moiety                                      |
| PA0390 | <i>metX</i>  | -2.22 | 0.0002   | homoserine O-acetyltransferase<br>Resistance-Nodulation-Cell Division (RND)         |
| PA0426 | <i>mexB</i>  | 2.59  | 3.20E-05 | multidrug efflux transporter MexB                                                   |
| PA0428 |              | -2.19 | 0.0012   | probable ATP-dependent RNA helicase                                                 |
| PA0447 | <i>gcdH</i>  | 2.16  | 0.0006   | glutaryl-CoA dehydrogenase                                                          |
| PA0450 |              | 4.13  | 0.0002   | probable phosphate transporter                                                      |
| PA0459 |              | 5.51  | 3.60E-05 | probable ClpA/B protease ATP binding subunit                                        |
| PA0460 |              | 4.86  | 7.59E-07 | hypothetical protein                                                                |
| PA0484 |              | 3.41  | 0.0009   | conserved hypothetical protein                                                      |
| PA0500 | <i>bioB</i>  | -3.75 | 3.63E-05 | biotin synthase                                                                     |
| PA0501 | <i>bioF</i>  | -2.39 | 4.34E-05 | 8-amino-7-oxononanoate synthase                                                     |
| PA0504 | <i>bioD</i>  | -2.04 | 0.0001   | dethiobiotin synthase                                                               |
| PA0508 |              | 5.35  | 0.0003   | probable acyl-CoA dehydrogenase                                                     |
| PA0520 | <i>nirQ</i>  | 2.03  | 0.0002   | regulatory protein NirQ                                                             |
| PA0551 | <i>epd</i>   | -2.06 | 0.0004   | D-erythrose 4-phosphate dehydrogenase                                               |
| PA0565 |              | 2.70  | 0.0007   | conserved hypothetical protein                                                      |
| PA0567 |              | 2.56  | 0.0001   | conserved hypothetical protein                                                      |
| PA0572 |              | 6.18  | 0.0004   | hypothetical protein                                                                |
| PA0575 |              | 3.65  | 0.0001   | conserved hypothetical protein                                                      |
| PA0578 |              | -4.92 | 9.54E-05 | conserved hypothetical protein                                                      |

|        |              |        |          |                                                                        |
|--------|--------------|--------|----------|------------------------------------------------------------------------|
| PA0579 | <i>rpsU</i>  | -5.03  | 0.0002   | 30S ribosomal protein S21                                              |
| PA0580 | <i>gcp</i>   | -2.64  | 0.0002   | O-sialoglycoprotein endopeptidase                                      |
| PA0586 |              | 12.82  | 2.54E-05 | conserved hypothetical protein                                         |
| PA0587 |              | 16.56  | 0.0001   | conserved hypothetical protein                                         |
| PA0588 |              | 3.17   | 0.0005   | conserved hypothetical protein                                         |
| PA0595 | <i>ostA</i>  | -2.34  | 0.0245   | organic solvent tolerance protein OstA precursor                       |
| PA0648 |              | 2.11   | 0.0004   | hypothetical protein                                                   |
| PA0654 | <i>speD</i>  | 2.22   | 0.0004   | S-adenosylmethionine decarboxylase proenzyme                           |
| PA0656 |              | 3.08   | 2.73E-05 | probable HIT family protein                                            |
| PA0673 |              | 3.10   | 0.0003   | hypothetical protein                                                   |
| PA0674 |              | 3.06   | 0.0001   | hypothetical protein                                                   |
| PA0675 |              | 3.01   | 1.94E-05 | probable sigma-70 factor, ECF subfamily                                |
| PA0676 |              | 4.19   | 1.73E-06 | probable transmembrane sensor                                          |
| PA0677 | <i>hxcW</i>  | 4.59   | 3.68E-05 | HxcW putative pseudopilin                                              |
| PA0678 | <i>hxcU</i>  | 8.23   | 7.24E-06 | HxcU putative pseudopilin                                              |
| PA0679 | <i>hxcP</i>  | 7.27   | 1.88E-05 | hypothetical protein                                                   |
| PA0680 | <i>hxcV</i>  | 2.38   | 0.0004   | HxcV putative pseudopilin                                              |
| PA0681 | <i>hxcT</i>  | 7.60   | 0.0001   | HxcT pseudopilin                                                       |
| PA0682 | <i>hxcX</i>  | 13.27  | 3.66E-05 | HxcX atypical pseudopilin                                              |
| PA0683 | <i>hxcY</i>  | 8.82   | 1.79E-05 | probable type II secretion system protein                              |
| PA0684 | <i>hxcZ</i>  | 11.68  | 3.81E-06 | probable type II secretion system protein                              |
| PA0685 | <i>hxcQ</i>  | 12.31  | 1.07E-05 | probable type II secretion system protein                              |
| PA0686 | <i>hxcR</i>  | 13.14  | 8.43E-06 | probable type II secretion system protein                              |
| PA0687 | <i>hxcS</i>  | 3.60   | 5.62E-05 | probable type II secretion system protein                              |
| PA0688 |              | 307.72 | 1.16E-06 | probable binding protein component of ABC transporter                  |
| PA0689 |              | 8.04   | 0.0001   | hypothetical protein                                                   |
| PA0690 |              | 7.82   | 2.23E-07 | hypothetical protein                                                   |
| PA0691 |              | 4.90   | 0.0002   | hypothetical protein                                                   |
| PA0692 |              | 4.49   | 3.99E-05 | hypothetical protein                                                   |
| PA0693 | <i>exbB2</i> | 20.15  | 1.41E-07 | transport protein ExbB2                                                |
| PA0694 | <i>exbD2</i> | 29.57  | 8.62E-08 | transport protein ExbD                                                 |
| PA0695 |              | 16.63  | 8.08E-08 | hypothetical protein                                                   |
| PA0696 |              | 37.97  | 1.48E-06 | hypothetical protein                                                   |
| PA0697 |              | 26.19  | 5.93E-07 | hypothetical protein                                                   |
| PA0698 |              | 45.03  | 5.50E-08 | hypothetical protein                                                   |
| PA0699 |              | 15.69  | 1.22E-06 | probable peptidyl-prolyl cis-trans isomerase, PpiC-type                |
| PA0700 |              | 22.81  | 8.25E-07 | hypothetical protein                                                   |
| PA0701 |              | 5.00   | 5.34E-05 | probable transcriptional regulator                                     |
| PA0730 |              | 11.03  | 7.44E-08 | probable transferase                                                   |
| PA0743 |              | 2.90   | 9.22E-05 | probable 3-hydroxyisobutyrate dehydrogenase                            |
| PA0763 | <i>mucA</i>  | 2.10   | 8.69E-05 | anti-sigma factor MucA<br>negative regulator for alginate biosynthesis |
| PA0764 | <i>mucB</i>  | 2.26   | 0.0074   | MucB                                                                   |
| PA0778 | <i>icp</i>   | -3.20  | 0.0426   | inhibitor of cysteine peptidase                                        |

|        |              |       |          |                                                                         |
|--------|--------------|-------|----------|-------------------------------------------------------------------------|
| PA0783 | <i>putP</i>  | -8.75 | 1.12E-05 | sodium/proline symporter PutP                                           |
| PA0788 |              | 2.18  | 0.0001   | hypothetical protein                                                    |
| PA0792 | <i>prpD</i>  | 5.13  | 7.41E-06 | propionate catabolic protein PrpD                                       |
| PA0793 |              | 4.00  | 1.48E-05 | hypothetical protein                                                    |
| PA0794 |              | 3.59  | 4.31E-06 | probable aconitate hydratase                                            |
| PA0795 | <i>prpC</i>  | 2.44  | 0.0001   | citrate synthase 2<br>carboxyphosphoenolpyruvate                        |
| PA0796 | <i>prpB</i>  | 3.44  | 6.52E-06 | phosphonmutase                                                          |
| PA0797 |              | 2.95  | 2.41E-05 | probable transcriptional regulator                                      |
| PA0805 |              | 2.31  | 4.42E-05 | hypothetical protein                                                    |
| PA0833 |              | 3.08  | 5.21E-05 | hypothetical protein                                                    |
| PA0841 |              | -2.08 | 0.0005   | hypothetical protein                                                    |
| PA0842 |              | 33.54 | 8.31E-07 | probable glycosyl transferase                                           |
| PA0843 | <i>plcR</i>  | 9.66  | 4.54E-05 | phospholipase accessory protein PlcR precursor                          |
| PA0844 | <i>plcH</i>  | 25.66 | 3.18E-05 | hemolytic phospholipase C precursor                                     |
| PA0848 |              | 6.92  | 0.0002   | probable alkyl hydroperoxide reductase                                  |
| PA0849 | <i>trxB2</i> | 4.62  | 3.48E-05 | thioredoxin reductase 2                                                 |
| PA0854 | <i>fumC2</i> | 2.22  | 6.53E-05 | fumarate hydratase                                                      |
| PA0867 |              | 2.05  | 6.79E-05 | hypothetical protein<br>succinylglutamate 5-semialdehyde                |
| PA0898 | <i>aruD</i>  | 2.22  | 0.0003   | dehydrogenase                                                           |
| PA0899 | <i>aruB</i>  | 3.50  | 1.95E-05 | succinylarginine dihydrolase                                            |
| PA0903 | <i>alaS</i>  | -2.51 | 0.0102   | alanyl-tRNA synthetase                                                  |
| PA0945 | <i>purM</i>  | -2.47 | 0.0003   | phosphoribosylaminoimidazole synthetase                                 |
| PA0947 |              | -2.22 | 0.0005   | conserved hypothetical protein                                          |
| PA0960 |              | 2.67  | 0.0005   | hypothetical protein                                                    |
| PA0961 |              | -2.17 | 0.0365   | probable cold-shock protein                                             |
| PA0963 | <i>aspS</i>  | -3.08 | 2.65E-05 | aspartyl-tRNA synthetase                                                |
| PA0964 |              | -2.33 | 0.0015   | conserved hypothetical protein                                          |
| PA0978 |              | 4.74  | 2.98E-05 | conserved hypothetical protein                                          |
| PA0979 |              | 11.37 | 2.24E-06 | conserved hypothetical protein                                          |
| PA0981 |              | 4.17  | 0.0001   | hypothetical protein                                                    |
| PA0982 |              | 2.05  | 0.0051   | hypothetical protein                                                    |
| PA0983 |              | 2.67  | 0.0016   | conserved hypothetical protein                                          |
| PA0996 | <i>pqsA</i>  | 4.16  | 0.019    | probable coenzyme A ligase<br>Homologous to beta-keto-acyl-acyl-carrier |
| PA0997 | <i>pqsB</i>  | 4.98  | 0.0094   | protein synthase<br>Homologous to beta-keto-acyl-acyl-carrier           |
| PA0998 | <i>pqsC</i>  | 4.47  | 0.0031   | protein synthase                                                        |
| PA0999 | <i>pqsD</i>  | 3.20  | 0.0026   | 3-oxoacyl-[acyl-carrier-protein] synthase III                           |
| PA1000 | <i>pqsE</i>  | 7.77  | 0.0031   | Quinolone signal response protein                                       |
| PA1001 | <i>phnA</i>  | 6.61  | 0.0033   | anthranilate synthase component I                                       |
| PA1002 | <i>phnB</i>  | 4.72  | 0.0047   | anthranilate synthase component II                                      |
| PA1003 | <i>myfR</i>  | 2.36  | 0.0003   | Transcriptional regulator                                               |
| PA1033 |              | 2.05  | 0.0007   | probable glutathione S-transferase                                      |
| PA1041 |              | 14.43 | 0.0002   | probable outer membrane protein precursor                               |

|        |             |       |          |                                                                      |
|--------|-------------|-------|----------|----------------------------------------------------------------------|
| PA1066 |             | 4.56  | 0.0005   | probable short-chain dehydrogenase                                   |
| PA1070 | <i>braG</i> | -2.80 | 0.003    | branched-chain amino acid transport protein                          |
| PA1071 | <i>braF</i> | -3.39 | 0.0009   | branched-chain amino acid transport protein                          |
| PA1072 | <i>braE</i> | -3.22 | 0.0001   | branched-chain amino acid transport protein                          |
| PA1073 | <i>braD</i> | -5.29 | 0.0001   | branched-chain amino acid transport protein                          |
| PA1074 | <i>braC</i> | -4.05 | 0.0023   | branched-chain amino acid transport protein                          |
| PA1078 | <i>flgC</i> | 2.06  | 0.0005   | flagellar basal-body rod protein FlgC                                |
| PA1082 | <i>flgG</i> | 2.00  | 0.0011   | flagellar basal-body rod protein FlgG                                |
| PA1086 | <i>flgK</i> | 2.32  | 0.0003   | flagellar hook-associated protein 1 FlgK                             |
| PA1087 | <i>flgL</i> | 2.04  | 4.93E-05 | flagellar hook-associated protein type 3 FlgL                        |
| PA1088 |             | 2.93  | 2.35E-05 | hypothetical protein                                                 |
| PA1090 |             | 3.53  | 0.0009   | hypothetical protein                                                 |
| PA1092 | <i>fliC</i> | 2.28  | 0.0016   | flagellin type B                                                     |
| PA1093 |             | 2.44  | 0.0003   | hypothetical protein                                                 |
| PA1096 |             | 3.14  | 0.0009   | hypothetical protein                                                 |
| PA1107 |             | 2.61  | 0.0002   | conserved hypothetical protein                                       |
| PA1112 |             | 2.14  | 0.0258   | conserved hypothetical protein                                       |
| PA1118 |             | 2.10  | 0.0084   | hypothetical protein                                                 |
| PA1130 | <i>rhlC</i> | 2.64  | 0.0022   | rhamnosyltransferase 2                                               |
| PA1134 |             | 23.33 | 0.0002   | hypothetical protein                                                 |
| PA1135 |             | 3.91  | 0.0001   | conserved hypothetical protein                                       |
| PA1147 |             | 2.20  | 0.0284   | probable amino acid permease                                         |
| PA1159 |             | -2.52 | 0.007    | probable cold-shock protein                                          |
| PA1172 | <i>napC</i> | 5.50  | 0.0006   | cytochrome c-type protein NapC                                       |
| PA1173 | <i>napB</i> | 10.69 | 0.0003   | cytochrome c-type protein NapB precursor                             |
| PA1174 | <i>napA</i> | 7.75  | 0.0003   | periplasmic nitrate reductase protein NapA                           |
| PA1175 | <i>napD</i> | 7.43  | 0.0001   | NapD protein of periplasmic nitrate reductase                        |
| PA1176 | <i>napF</i> | 4.67  | 0.0008   | ferredoxin protein NapF                                              |
| PA1177 | <i>napE</i> | 4.83  | 0.0005   | periplasmic nitrate reductase protein NapE                           |
| PA1183 | <i>dctA</i> | -4.73 | 0.0251   | C4-dicarboxylate transport protein                                   |
| PA1202 |             | 6.99  | 4.84E-05 | probable hydrolase                                                   |
| PA1203 |             | 3.25  | 2.91E-05 | hypothetical protein                                                 |
| PA1204 |             | 2.31  | 6.02E-05 | conserved hypothetical protein                                       |
| PA1205 |             | 2.38  | 8.72E-05 | conserved hypothetical protein                                       |
| PA1211 |             | 2.33  | 0.0227   | hypothetical protein<br>probable major facilitator superfamily (MFS) |
| PA1212 |             | 2.30  | 0.0015   | transporter                                                          |
| PA1213 |             | 2.61  | 0.0035   | hypothetical protein                                                 |
| PA1214 |             | 5.20  | 0.0134   | hypothetical protein                                                 |
| PA1215 |             | 7.71  | 0.0008   | hypothetical protein                                                 |
| PA1216 |             | 8.39  | 0.0022   | hypothetical protein                                                 |
| PA1217 |             | 5.39  | 0.0004   | probable 2-isopropylmalate synthase                                  |
| PA1218 |             | 3.36  | 0.0003   | hypothetical protein                                                 |
| PA1219 |             | 2.69  | 0.0086   | hypothetical protein                                                 |
| PA1245 |             | 3.97  | 6.24E-05 | hypothetical protein                                                 |
| PA1249 | <i>aprA</i> | 2.06  | 0.001    | alkaline metalloproteinase precursor                                 |

|        |             |       |          |                                                                              |
|--------|-------------|-------|----------|------------------------------------------------------------------------------|
| PA1273 | <i>cobB</i> | -2.62 | 0.0001   | cobyrinic acid a,c-diamide synthase                                          |
| PA1274 |             | -2.01 | 0.001    | conserved hypothetical protein                                               |
| PA1275 | <i>cobD</i> | -2.53 | 0.0048   | cobalamin biosynthetic protein CobD                                          |
| PA1276 | <i>cobC</i> | -2.07 | 0.0081   | cobalamin biosynthetic protein CobC                                          |
| PA1278 | <i>cobP</i> | -2.46 | 0.0014   | cobinamide kinase                                                            |
| PA1323 |             | 2.76  | 3.89E-05 | hypothetical protein                                                         |
| PA1327 |             | 8.94  | 1.09E-06 | probable protease                                                            |
| PA1330 |             | 2.16  | 0.0001   | probable short-chain dehydrogenase                                           |
| PA1331 |             | -2.01 | 0.0282   | conserved hypothetical protein                                               |
| PA1338 | <i>ggt</i>  | -2.53 | 0.0017   | gamma-glutamyltranspeptidase precursor                                       |
| PA1341 |             | -2.24 | 0.03     | probable permease of ABC transporter                                         |
| PA1344 |             | 2.51  | 0.0054   | probable short-chain dehydrogenase                                           |
| PA1366 |             | 2.61  | 0.0132   | hypothetical protein                                                         |
| PA1389 |             | 2.26  | 0.003    | probable glycosyl transferase                                                |
| PA1423 |             | 2.67  | 0.0036   | probable chemotaxis transducer                                               |
| PA1456 | <i>cheY</i> | 2.58  | 0.0038   | two-component response regulator CheY                                        |
| PA1471 |             | 2.88  | 0.0001   | hypothetical protein                                                         |
| PA1473 |             | 2.49  | 0.0004   | hypothetical protein                                                         |
| PA1478 |             | -2.29 | 0.0015   | hypothetical protein                                                         |
| PA1479 | <i>ccmE</i> | -2.51 | 0.0002   | cytochrome C-type biogenesis protein CcmE                                    |
| PA1482 | <i>ccmH</i> | -2.50 | 0.0001   | cytochrome C-type biogenesis protein CcmH                                    |
| PA1483 | <i>cycH</i> | -2.28 | 0.0002   | cytochrome c-type biogenesis protein                                         |
| PA1493 | <i>cysP</i> | -2.14 | 0.0158   | sulfate-binding protein of ABC transporter                                   |
| PA1524 | <i>xdhA</i> | -2.15 | 0.0009   | xanthine dehydrogenase                                                       |
| PA1545 |             | 3.24  | 0.0002   | hypothetical protein<br>oxygen-independent coproporphyrinogen III<br>oxidase |
| PA1546 | <i>hemN</i> | 2.25  | 0.0128   | oxidase                                                                      |
| PA1552 |             | -4.87 | 2.14E-05 | probable cytochrome c                                                        |
| PA1553 |             | -3.62 | 9.97E-05 | probable cytochrome c oxidase subunit                                        |
| PA1561 | <i>aer</i>  | 2.23  | 4.73E-05 | aerotaxis receptor Aer                                                       |
| PA1562 | <i>acnA</i> | 6.70  | 5.17E-06 | aconitate hydratase 1                                                        |
| PA1571 |             | 24.96 | 2.28E-08 | hypothetical protein                                                         |
| PA1587 | <i>lpdG</i> | -2.30 | 0.0019   | lipoamide dehydrogenase-glc                                                  |
| PA1592 |             | 2.07  | 0.0015   | hypothetical protein                                                         |
| PA1604 |             | 2.59  | 0.0166   | hypothetical protein                                                         |
| PA1606 |             | 34.82 | 1.32E-08 | hypothetical protein                                                         |
| PA1609 | <i>fabB</i> | -2.67 | 0.0004   | beta-ketoacyl-ACP synthase I                                                 |
| PA1610 | <i>fabA</i> | -2.41 | 0.0001   | beta-hydroxydecanoyl-ACP dehydrase                                           |
| PA1665 |             | 2.04  | 0.0047   | hypothetical protein                                                         |
| PA1689 |             | -4.93 | 0.0069   | conserved hypothetical protein                                               |
| PA1712 | <i>exsB</i> | -2.13 | 0.0098   | exoenzyme S synthesis protein B                                              |
| PA1731 |             | 2.43  | 0.0011   | conserved hypothetical protein                                               |
| PA1732 |             | 2.11  | 0.0003   | conserved hypothetical protein                                               |
| PA1733 |             | 2.99  | 0.0004   | conserved hypothetical protein                                               |
| PA1745 |             | 3.76  | 0.0007   | hypothetical protein                                                         |
| PA1750 |             | -2.90 | 0.0028   | phospho-2-dehydro-3-deoxyheptonate aldolase                                  |

|        |              |       |          |                                                                    |
|--------|--------------|-------|----------|--------------------------------------------------------------------|
| PA1753 |              | 2.51  | 0.0002   | conserved hypothetical protein                                     |
| PA1784 |              | 2.13  | 0.0017   | hypothetical protein                                               |
| PA1787 | <i>acnB</i>  | -2.63 | 0.0017   | aconitate hydratase 2                                              |
| PA1790 |              | -2.83 | 0.0112   | hypothetical protein                                               |
| PA1794 | <i>glnS</i>  | -2.26 | 0.014    | glutaminyl-tRNA synthetase                                         |
| PA1800 | <i>tig</i>   | -3.51 | 0.0022   | trigger factor                                                     |
| PA1806 | <i>fabI</i>  | 2.18  | 0.0011   | NADH-dependent enoyl-ACP reductase                                 |
| PA1838 | <i>cysI</i>  | -3.30 | 0.0001   | sulfite reductase                                                  |
| PA1842 |              | -2.01 | 0.0013   | hypothetical protein                                               |
| PA1860 |              | 2.82  | 0.0033   | hypothetical protein                                               |
| PA1864 |              | 2.38  | 0.0211   | probable transcriptional regulator                                 |
| PA1871 | <i>lasA</i>  | 5.45  | 0.0281   | LasA protease precursor                                            |
| PA1873 |              | 2.98  | 0.0002   | hypothetical protein                                               |
| PA1880 |              | 3.04  | 0.002    | probable oxidoreductase                                            |
| PA1881 |              | 3.47  | 0.0005   | probable oxidoreductase                                            |
| PA1887 |              | 2.36  | 0.0004   | hypothetical protein                                               |
| PA1888 |              | 5.71  | 5.32E-05 | hypothetical protein                                               |
| PA1900 | <i>phzB2</i> | 11.73 | 0.0252   | probable phenazine biosynthesis protein                            |
| PA1901 | <i>phzC2</i> | 6.75  | 0.0106   | phenazine biosynthesis protein PhzC                                |
| PA1902 | <i>phzD2</i> | 11.46 | 0.0025   | phenazine biosynthesis protein PhzD                                |
| PA1903 | <i>phzE2</i> | 2.97  | 0.0305   | phenazine biosynthesis protein PhzE                                |
| PA1904 | <i>phzF2</i> | 9.00  | 0.0064   | probable phenazine biosynthesis protein                            |
| PA1905 | <i>phzG2</i> | 7.17  | 0.0055   | probable pyridoxamine 5'-phosphate oxidase                         |
| PA1914 |              | 4.66  | 0.0027   | conserved hypothetical protein                                     |
| PA1926 |              | -2.04 | 0.0064   | conserved hypothetical protein                                     |
| PA1930 |              | 2.95  | 0.0006   | probable chemotaxis transducer                                     |
| PA1945 |              | 2.61  | 0.002    | probable transcriptional regulator                                 |
| PA1972 |              | -2.61 | 0.0231   | conserved hypothetical protein                                     |
| PA1985 | <i>pqqA</i>  | 3.17  | 0.001    | pyrroloquinoline quinone biosynthesis protein A                    |
| PA1987 | <i>pqqC</i>  | 2.22  | 0.0005   | pyrroloquinoline quinone biosynthesis protein C                    |
| PA2015 | <i>gnyD</i>  | -2.04 | 0.0006   | Citronelloyl-CoA dehydrogenase, GnyD                               |
| PA2022 |              | 52.40 | 8.10E-07 | probable nucleotide sugar dehydrogenase                            |
| PA2023 | <i>galU</i>  | 5.77  | 6.38E-06 | UTP--glucose-1-phosphate uridylyltransferase                       |
| PA2030 |              | 2.64  | 0.0025   | hypothetical protein                                               |
| PA2031 |              | 2.39  | 0.0002   | hypothetical protein                                               |
| PA2046 |              | 2.07  | 0.0122   | hypothetical protein                                               |
| PA2048 |              | 5.73  | 3.53E-06 | hypothetical protein                                               |
| PA2067 |              | 3.79  | 0.014    | probable hydrolase<br>probable major facilitator superfamily (MFS) |
| PA2068 |              | 4.59  | 0.0248   | transporter                                                        |
| PA2069 |              | 19.26 | 0.0002   | probable carbamoyl transferase                                     |
| PA2071 | <i>fusA2</i> | 2.49  | 0.0003   | elongation factor G                                                |
| PA2104 |              | 2.05  | 0.0046   | probable cysteine synthase                                         |
| PA2106 |              | 2.03  | 0.0007   | hypothetical protein                                               |
| PA2119 |              | 3.33  | 7.48E-05 | alcohol dehydrogenase (Zn-dependent)                               |
| PA2171 |              | 2.12  | 0.001    | hypothetical protein                                               |

|        |              |       |          |                                               |
|--------|--------------|-------|----------|-----------------------------------------------|
| PA2174 |              | 4.43  | 0.004    | hypothetical protein                          |
| PA2190 |              | 2.51  | 0.0025   | conserved hypothetical protein                |
| PA2197 |              | 2.15  | 0.0163   | conserved hypothetical protein                |
|        |              |       |          | probable binding protein component of ABC     |
| PA2204 |              | -3.90 | 0.0004   | transporter                                   |
| PA2264 |              | 2.90  | 0.0076   | conserved hypothetical protein                |
| PA2265 |              | 2.04  | 0.0002   | gluconate dehydrogenase                       |
| PA2266 |              | 3.29  | 4.39E-05 | probable cytochrome c precursor               |
| PA2302 |              | 8.91  | 6.27E-05 | probable non-ribosomal peptide synthetase     |
| PA2303 |              | 4.53  | 9.61E-05 | hypothetical protein                          |
| PA2304 |              | 2.25  | 0.0009   | hypothetical protein                          |
|        |              |       |          | probable glyceraldehyde-3-phosphate           |
| PA2323 |              | 4.99  | 0.0003   | dehydrogenase                                 |
|        |              |       |          | probable glycerophosphoryl diester            |
| PA2352 |              | 5.83  | 2.37E-05 | phosphodiesterase                             |
| PA2360 |              | 3.22  | 0.003    | hypothetical protein                          |
| PA2365 |              | 8.73  | 0.0002   | conserved hypothetical protein                |
| PA2366 |              | 7.08  | 0.0055   | conserved hypothetical protein                |
| PA2367 |              | 2.94  | 0.0025   | hypothetical protein                          |
| PA2368 |              | 4.49  | 0.0036   | hypothetical protein                          |
| PA2369 |              | 3.35  | 0.0017   | hypothetical protein                          |
| PA2370 |              | 3.46  | 0.0016   | hypothetical protein                          |
| PA2371 |              | 3.04  | 0.003    | probable ClpA/B-type protease                 |
| PA2372 |              | 3.15  | 0.0088   | hypothetical protein                          |
| PA2373 |              | 3.65  | 0.0054   | conserved hypothetical protein                |
| PA2374 |              | 2.24  | 0.0089   | hypothetical protein                          |
| PA2375 |              | 2.47  | 0.001    | hypothetical protein                          |
| PA2381 |              | 9.18  | 3.53E-07 | hypothetical protein                          |
| PA2396 | <i>pvdF</i>  | 2.07  | 0.0449   | pyoverdine synthetase F                       |
| PA2426 | <i>pvdS</i>  | 4.29  | 0.0095   | sigma factor PvdS                             |
| PA2427 |              | 3.33  | 9.18E-05 | hypothetical protein                          |
| PA2428 |              | 17.82 | 8.88E-08 | hypothetical protein                          |
| PA2433 |              | 4.37  | 0.0005   | hypothetical protein                          |
| PA2444 | <i>glyA2</i> | -2.05 | 0.0003   | serine hydroxymethyltransferase               |
| PA2445 | <i>gcvP2</i> | -3.27 | 3.02E-05 | glycine cleavage system protein P2            |
| PA2453 |              | -2.40 | 9.01E-05 | hypothetical protein                          |
| PA2475 |              | 2.66  | 0.0005   | probable cytochrome P450                      |
| PA2485 |              | 2.06  | 0.0052   | hypothetical protein                          |
| PA2505 |              | -6.71 | 9.54E-05 | probable porin                                |
| PA2519 | <i>xylS</i>  | -2.40 | 0.0116   | transcriptional regulator XylS                |
|        |              |       |          | Resistance-Nodulation-Cell Division (RND)     |
| PA2520 | <i>czcA</i>  | -2.92 | 0.0014   | divalent metal cation efflux transporter CzcA |
|        |              |       |          | Resistance-Nodulation-Cell Division (RND)     |
|        |              |       |          | divalent metal cation efflux membrane fusion  |
| PA2521 | <i>czcB</i>  | -4.80 | 0.0015   | protein CzcB precursor                        |
| PA2522 | <i>czcC</i>  | -3.59 | 0.001    | outer membrane protein precursor CzcC         |

|        |             |       |          |                                                            |
|--------|-------------|-------|----------|------------------------------------------------------------|
| PA2525 |             | 2.19  | 0.0006   | probable outer membrane protein precursor                  |
| PA2533 |             | -2.26 | 0.0052   | probable sodium:alanine symporter                          |
| PA2544 |             | 2.35  | 0.0036   | hypothetical protein                                       |
| PA2548 |             | 4.21  | 0.0003   | hypothetical protein                                       |
| PA2561 |             | 2.80  | 0.0011   | probable chemotaxis transducer                             |
| PA2562 |             | 8.51  | 4.00E-06 | hypothetical protein                                       |
| PA2565 |             | 2.16  | 0.0049   | hypothetical protein                                       |
| PA2566 |             | 2.59  | 0.0155   | conserved hypothetical protein                             |
| PA2571 |             | 4.19  | 0.0015   | probable two-component sensor                              |
| PA2572 |             | 2.22  | 0.0008   | probable two-component response regulator                  |
| PA2573 |             | 4.95  | 0.0022   | probable chemotaxis transducer                             |
|        |             |       |          | probable periplasmic spermidine/putrescine-binding protein |
| PA2592 |             | 4.40  | 0.0023   |                                                            |
| PA2618 |             | 2.52  | 0.0028   | hypothetical protein                                       |
| PA2619 | <i>infA</i> | -3.00 | 1.92E-05 | initiation factor                                          |
| PA2620 | <i>clpA</i> | 2.15  | 0.0015   | ATP-binding protease component ClpA                        |
| PA2621 |             | 2.37  | 0.0007   | conserved hypothetical protein                             |
| PA2624 | <i>idh</i>  | -2.58 | 0.0002   | isocitrate dehydrogenase                                   |
| PA2625 |             | -2.03 | 0.0024   | conserved hypothetical protein                             |
| PA2635 |             | 87.04 | 3.60E-09 | hypothetical protein                                       |
| PA2700 |             | 2.82  | 0.0006   | probable porin                                             |
|        |             |       |          | probable major facilitator superfamily (MFS) transporter   |
| PA2701 |             | 2.29  | 0.0032   |                                                            |
| PA2717 | <i>cpo</i>  | 4.19  | 0.0016   | chloroperoxidase precursor                                 |
| PA2731 |             | 2.58  | 0.0003   | hypothetical protein                                       |
| PA2739 | <i>pheT</i> | -2.10 | 0.0023   | phenylalanyl-tRNA synthetase, beta subunit                 |
| PA2740 | <i>pheS</i> | -2.70 | 0.001    | phenylalanyl-tRNA synthetase, alpha-subunit                |
| PA2741 | <i>rplT</i> | -2.18 | 6.32E-05 | 50S ribosomal protein L20                                  |
| PA2764 |             | 2.30  | 0.001    | hypothetical protein                                       |
| PA2770 |             | -2.90 | 0.0004   | hypothetical protein                                       |
| PA2771 |             | 3.55  | 0.0013   | conserved hypothetical protein                             |
| PA2781 |             | 2.07  | 0.0011   | hypothetical protein                                       |
| PA2787 | <i>cpg2</i> | 2.26  | 0.0053   | carboxypeptidase G2 precursor                              |
| PA2788 |             | 2.16  | 0.0019   | probable chemotaxis transducer                             |
| PA2795 |             | -2.11 | 0.003    | conserved hypothetical protein                             |
| PA2803 |             | 8.84  | 6.07E-05 | hypothetical protein                                       |
| PA2804 |             | 14.90 | 2.86E-06 | hypothetical protein                                       |
| PA2815 |             | 5.27  | 0.0003   | probable acyl-CoA dehydrogenase                            |
| PA2840 |             | -3.27 | 0.0007   | probable ATP-dependent RNA helicase                        |
| PA2851 | <i>efp</i>  | -3.50 | 0.0001   | translation elongation factor P                            |
| PA2879 |             | 2.67  | 0.0001   | probable transcriptional regulator                         |
| PA2881 |             | 18.90 | 2.32E-06 | probable two-component response regulator                  |
| PA2882 |             | 13.32 | 0.0002   | probable two-component sensor                              |
| PA2904 | <i>cobI</i> | -2.60 | 0.0002   | precorrin-2 methyltransferase CobI                         |
| PA2918 |             | 3.11  | 0.0052   | probable short-chain dehydrogenase                         |
| PA2920 |             | 2.23  | 0.0018   | probable chemotaxis transducer                             |

|        |              |       |          |                                                                                 |
|--------|--------------|-------|----------|---------------------------------------------------------------------------------|
| PA2937 |              | 4.39  | 0.0011   | hypothetical protein                                                            |
| PA2939 |              | 25.19 | 0.0441   | probable aminopeptidase                                                         |
| PA2943 |              | -2.86 | 0.0002   | phospho-2-dehydro-3-deoxyheptonate aldolase                                     |
| PA2945 |              | -2.17 | 0.0274   | conserved hypothetical protein                                                  |
| PA2963 |              | -2.03 | 0.0212   | conserved hypothetical protein                                                  |
| PA2965 | <i>fabF1</i> | -2.13 | 0.0018   | beta-ketoacyl-acyl carrier protein synthase II                                  |
| PA2968 | <i>fabD</i>  | -2.35 | 0.0002   | malonyl-CoA-[acyl-carrier-protein] transacylase                                 |
| PA2969 | <i>plsX</i>  | -2.27 | 0.0025   | fatty acid biosynthesis protein PlsX                                            |
| PA2970 | <i>rpmF</i>  | -5.76 | 1.45E-05 | 50S ribosomal protein L32                                                       |
| PA2971 |              | -5.89 | 6.07E-06 | conserved hypothetical protein                                                  |
| PA2985 |              | 3.37  | 0.0018   | hypothetical protein<br>Na <sup>+</sup> -translocating NADH:quinone             |
| PA2994 | <i>nqrF</i>  | -2.33 | 0.0002   | oxidoreductase, subunit Nqr6<br>Na <sup>+</sup> -translocating NADH:quinone     |
| PA2995 | <i>nqrE</i>  | -2.88 | 0.0013   | oxidoreductase subunit Nqr5<br>Na <sup>+</sup> -translocating NADH:ubiquinone   |
| PA2996 | <i>nqrD</i>  | -2.83 | 6.35E-05 | oxidoreductase subunit Nqr4<br>Na <sup>+</sup> -translocating NADH:ubiquinone   |
| PA2997 | <i>nqrC</i>  | -3.51 | 0.0003   | oxidoreductase subunit Nqr3<br>Na <sup>+</sup> -translocating NADH:ubiquinone   |
| PA2998 | <i>nqrB</i>  | -4.39 | 0.0002   | oxidoreductase subunit Nqr2<br>Na <sup>+</sup> -translocating NADH:ubiquinone   |
| PA2999 | <i>nqrA</i>  | -2.04 | 0.0009   | oxidoreductase subunit Nqr1                                                     |
| PA3013 | <i>foaB</i>  | 2.90  | 8.11E-06 | fatty-acid oxidation complex beta-subunit                                       |
| PA3014 | <i>faoA</i>  | 2.76  | 5.59E-05 | fatty-acid oxidation complex alpha-subunit                                      |
| PA3018 |              | -2.47 | 0.0005   | hypothetical protein<br>probable ATP-binding component of ABC                   |
| PA3019 |              | -2.36 | 0.0007   | transporter                                                                     |
| PA3021 |              | 2.02  | 0.0027   | hypothetical protein                                                            |
| PA3028 | <i>moeA2</i> | -2.43 | 0.0195   | molybdenum cofactor biosynthesis protein A2                                     |
| PA3040 |              | 3.01  | 9.86E-05 | conserved hypothetical protein                                                  |
| PA3041 |              | 2.34  | 0.0002   | hypothetical protein                                                            |
| PA3049 | <i>rmf</i>   | 7.08  | 0.0071   | ribosome modulation factor                                                      |
| PA3095 | <i>xcpZ</i>  | 2.60  | 7.96E-05 | general secretion pathway protein M                                             |
| PA3096 | <i>xcpY</i>  | 2.78  | 0.0001   | general secretion pathway protein L                                             |
| PA3097 | <i>xcpX</i>  | 2.94  | 0.0008   | general secretion pathway protein K                                             |
| PA3098 | <i>xcpW</i>  | 2.79  | 9.25E-05 | general secretion pathway protein J                                             |
| PA3099 | <i>xcpV</i>  | 2.21  | 8.24E-05 | general secretion pathway protein I<br>General secretion pathway outer membrane |
| PA3100 | <i>xcpU</i>  | 2.85  | 8.71E-05 | protein H precursor                                                             |
| PA3101 | <i>xcpT</i>  | 4.89  | 2.13E-06 | general secretion pathway protein G                                             |
| PA3102 | <i>xcpS</i>  | 3.00  | 5.12E-05 | general secretion pathway protein F                                             |
| PA3103 | <i>xcpR</i>  | 2.70  | 5.09E-05 | general secretion pathway protein E                                             |
| PA3104 | <i>xcpP</i>  | 3.90  | 3.49E-05 | secretion protein XcpP                                                          |
| PA3105 | <i>xcpQ</i>  | 4.58  | 2.37E-05 | general secretion pathway protein D                                             |
| PA3108 | <i>purF</i>  | -2.06 | 0.0219   | amidophosphoribosyltransferase                                                  |

|        |              |        |          |                                                                                                          |
|--------|--------------|--------|----------|----------------------------------------------------------------------------------------------------------|
| PA3112 | <i>accD</i>  | -2.42  | 0.0025   | acetyl-CoA carboxylase beta subunit                                                                      |
| PA3118 | <i>leuB</i>  | -2.49  | 8.48E-05 | 3-isopropylmalate dehydrogenase                                                                          |
| PA3119 |              | -3.30  | 0.0006   | conserved hypothetical protein                                                                           |
| PA3120 | <i>leuD</i>  | -2.32  | 0.0016   | 3-isopropylmalate dehydratase small subunit                                                              |
| PA3121 | <i>leuC</i>  | -3.36  | 0.0001   | 3-isopropylmalate dehydratase large subunit                                                              |
| PA3149 | <i>wbpH</i>  | 2.25   | 0.0001   | probable glycosyltransferase WbpH                                                                        |
| PA3162 | <i>rpsA</i>  | -3.82  | 1.68E-05 | 30S ribosomal protein S1                                                                                 |
| PA3167 | <i>serC</i>  | -2.52  | 0.0023   | 3-phosphoserine aminotransferase                                                                         |
| PA3181 |              | 2.14   | 0.0118   | 2-keto-3-deoxy-6-phosphogluconate aldolase                                                               |
| PA3182 | <i>pgl</i>   | 3.07   | 0.0229   | 6-phosphogluconolactonase                                                                                |
| PA3219 |              | 18.20  | 2.83E-06 | hypothetical protein                                                                                     |
| PA3221 | <i>csaA</i>  | 2.13   | 0.0137   | CsaA protein                                                                                             |
| PA3249 |              | 6.55   | 0.0002   | probable transcriptional regulator                                                                       |
| PA3250 |              | 6.04   | 3.94E-06 | hypothetical protein                                                                                     |
| PA3251 |              | 5.42   | 0.0001   | hypothetical protein                                                                                     |
| PA3252 |              | 2.01   | 0.0003   | probable permease of ABC transporter                                                                     |
| PA3253 |              | 5.70   | 0.0002   | probable permease of ABC transporter<br>probable ATP-binding component of ABC<br>transporter             |
| PA3254 |              | 2.49   | 0.0003   | transporter                                                                                              |
| PA3255 |              | 2.51   | 0.0024   | hypothetical protein                                                                                     |
| PA3279 | <i>oprP</i>  | 249.93 | 7.79E-08 | Phosphate-specific outer membrane porin OprP<br>precursor<br>Pyrophosphate-specific outer membrane porin |
| PA3280 | <i>oprO</i>  | 16.59  | 3.31E-06 | OprO precursor                                                                                           |
| PA3289 |              | 2.00   | 0.0011   | hypothetical protein                                                                                     |
| PA3296 | <i>phoA</i>  | 69.06  | 2.30E-09 | alkaline phosphatase                                                                                     |
| PA3308 | <i>hepA</i>  | -2.05  | 0.0023   | RNA helicase HepA                                                                                        |
| PA3319 | <i>plcN</i>  | 16.36  | 1.12E-07 | non-hemolytic phospholipase C precursor                                                                  |
| PA3326 |              | 3.11   | 0.0024   | probable Clp-family ATP-dependent protease                                                               |
| PA3327 |              | 4.00   | 3.83E-05 | probable non-ribosomal peptide synthetase                                                                |
| PA3328 |              | 8.62   | 0.0003   | probable FAD-dependent monooxygenase                                                                     |
| PA3329 |              | 18.35  | 0.0002   | hypothetical protein                                                                                     |
| PA3330 |              | 28.49  | 0.0002   | probable short chain dehydrogenase                                                                       |
| PA3331 |              | 22.44  | 0.0004   | cytochrome P450                                                                                          |
| PA3332 |              | 17.85  | 0.0001   | conserved hypothetical protein                                                                           |
| PA3333 | <i>fabH2</i> | 15.12  | 0.0006   | 3-oxoacyl-[acyl-carrier-protein] synthase III                                                            |
| PA3334 |              | 7.86   | 0.0005   | probable acyl carrier protein                                                                            |
| PA3335 |              | 6.66   | 0.0013   | hypothetical protein                                                                                     |
| PA3344 | <i>recQ</i>  | -3.18  | 2.16E-05 | ATP-dependent DNA helicase RecQ                                                                          |
| PA3347 |              | 2.96   | 0.0002   | hypothetical protein                                                                                     |
| PA3369 |              | 40.29  | 1.78E-08 | hypothetical protein                                                                                     |
| PA3370 |              | 21.81  | 2.59E-07 | hypothetical protein                                                                                     |
| PA3371 |              | 22.52  | 2.20E-07 | hypothetical protein                                                                                     |
| PA3372 | <i>phnP</i>  | 5.30   | 1.78E-05 | conserved hypothetical protein                                                                           |
| PA3373 | <i>phnN</i>  | 6.32   | 7.97E-07 | conserved hypothetical protein                                                                           |
| PA3374 | <i>phnM</i>  | 25.35  | 1.32E-07 | conserved hypothetical protein                                                                           |

|        |             |        |          |                                                                                             |
|--------|-------------|--------|----------|---------------------------------------------------------------------------------------------|
| PA3375 | <i>phnL</i> | 17.98  | 6.48E-06 | probable ATP-binding component of ABC transporter                                           |
| PA3376 | <i>phnK</i> | 18.56  | 1.31E-06 | probable ATP-binding component of ABC transporter                                           |
| PA3377 | <i>phnJ</i> | 25.55  | 4.71E-07 | conserved hypothetical protein                                                              |
| PA3378 | <i>phnI</i> | 20.34  | 1.42E-06 | conserved hypothetical protein                                                              |
| PA3379 | <i>phnH</i> | 13.82  | 2.36E-06 | conserved hypothetical protein                                                              |
| PA3380 | <i>phnG</i> | 19.86  | 5.29E-07 | conserved hypothetical protein                                                              |
| PA3381 | <i>phnF</i> | 6.64   | 4.69E-06 | probable transcriptional regulator                                                          |
| PA3382 | <i>phnE</i> | 52.55  | 8.96E-08 | phosphonate transport protein PhnE binding protein component of ABC phosphonate transporter |
| PA3383 | <i>phnD</i> | 90.96  | 2.00E-09 | ATP-binding component of ABC phosphonate transporter                                        |
| PA3384 | <i>phnC</i> | 27.21  | 2.47E-07 | transporter                                                                                 |
| PA3397 | <i>fpr</i>  | -7.24  | 2.72E-05 | ferredoxin--NADP+ reductase                                                                 |
| PA3416 |             | 3.23   | 0.0021   | probable pyruvate dehydrogenase E1 component, beta chain                                    |
| PA3417 |             | 2.40   | 0.0084   | probable pyruvate dehydrogenase E1 component, alpha subunit                                 |
| PA3418 | <i>ldh</i>  | 5.39   | 5.04E-05 | leucine dehydrogenase                                                                       |
| PA3431 |             | 2.84   | 0.0128   | conserved hypothetical protein                                                              |
| PA3432 |             | 5.16   | 0.0009   | hypothetical protein                                                                        |
| PA3441 |             | -2.10  | 0.0063   | probable molybdopterin-binding protein                                                      |
| PA3442 |             | -2.68  | 0.0041   | probable ATP-binding component of ABC transporter                                           |
| PA3445 |             | -2.93  | 0.0004   | conserved hypothetical protein                                                              |
| PA3450 |             | -3.06  | 0.0028   | probable antioxidant protein                                                                |
| PA3451 |             | 4.36   | 6.24E-05 | hypothetical protein                                                                        |
| PA3459 |             | 7.86   | 3.27E-07 | probable glutamine amidotransferase                                                         |
| PA3460 |             | 23.03  | 1.05E-07 | probable acetyltransferase                                                                  |
| PA3461 |             | 24.38  | 5.29E-07 | conserved hypothetical protein                                                              |
| PA3462 |             | 2.17   | 0.0007   | probable sensor/response regulator hybrid                                                   |
| PA3476 | <i>rhlI</i> | 2.96   | 0.0002   | autoinducer synthesis protein RhII                                                          |
| PA3477 | <i>rhlR</i> | 4.65   | 0.0002   | transcriptional regulator RhIR                                                              |
| PA3478 | <i>rhlB</i> | 8.97   | 0.001    | rhamnosyltransferase chain B                                                                |
| PA3479 | <i>rhlA</i> | 11.46  | 0.0005   | rhamnosyltransferase chain A                                                                |
| PA3515 |             | -3.81  | 0.0025   | hypothetical protein                                                                        |
| PA3516 |             | -5.13  | 0.0012   | probable lyase                                                                              |
| PA3517 |             | -9.93  | 1.39E-06 | probable lyase                                                                              |
| PA3518 |             | -10.94 | 1.18E-06 | hypothetical protein                                                                        |
| PA3519 |             | -8.29  | 5.36E-06 | hypothetical protein                                                                        |
| PA3520 |             | 2.36   | 0.0012   | hypothetical protein                                                                        |
| PA3522 |             | -3.08  | 0.0026   | probable Resistance-Nodulation-Cell Division (RND) efflux transporter                       |
| PA3523 |             | -3.31  | 0.0049   | probable Resistance-Nodulation-Cell Division (RND) efflux membrane fusion protein           |

|        |             |        |          |                                           |
|--------|-------------|--------|----------|-------------------------------------------|
|        |             |        |          | precursor                                 |
| PA3537 | <i>argF</i> | -2.12  | 0.0003   | ornithine carbamoyltransferase, anabolic  |
| PA3540 | <i>algD</i> | 2.31   | 0.0006   | GDP-mannose 6-dehydrogenase AlgD          |
| PA3550 | <i>algF</i> | 2.22   | 0.0099   | alginate o-acetyltransferase AlgF         |
|        |             |        |          | phosphomannose isomerase / guanosine 5'-  |
| PA3551 | <i>algA</i> | 5.08   | 0.0002   | diphospho-D-mannose pyrophosphorylase     |
| PA3558 |             | 2.69   | 0.0006   | hypothetical protein                      |
| PA3559 |             | 5.02   | 2.58E-05 | probable nucleotide sugar dehydrogenase   |
| PA3586 |             | 3.14   | 0.027    | probable hydrolase                        |
| PA3603 | <i>dgkA</i> | -2.02  | 0.0013   | diacylglycerol kinase                     |
| PA3615 |             | 2.41   | 0.0023   | hypothetical protein                      |
| PA3622 | <i>rpoS</i> | 3.12   | 0.0005   | sigma factor RpoS                         |
| PA3632 |             | -2.73  | 4.27E-05 | conserved hypothetical protein            |
|        |             |        |          | acetyl-coenzyme A carboxylase carboxyl    |
| PA3639 | <i>accA</i> | -2.04  | 0.0001   | transferase (alpha subunit)               |
| PA3656 | <i>rpsB</i> | -13.85 | 2.82E-07 | 30S ribosomal protein S2                  |
| PA3666 | <i>dapD</i> | -2.10  | 0.0013   | tetrahydrodipicolinate succinylase        |
| PA3674 |             | 2.17   | 0.0053   | hypothetical protein                      |
| PA3691 |             | 3.34   | 4.78E-05 | hypothetical protein                      |
| PA3692 |             | 4.34   | 3.49E-05 | probable outer membrane protein precursor |
| PA3700 | <i>lysS</i> | -3.02  | 0.0006   | lysyl-tRNA synthetase                     |
| PA3702 | <i>wspR</i> | 2.41   | 0.0007   | probable two-component response regulator |
| PA3723 |             | 7.33   | 0.0006   | probable FMN oxidoreductase               |
| PA3742 | <i>rplS</i> | -10.96 | 3.50E-06 | 50S ribosomal protein L19                 |
| PA3743 | <i>trmD</i> | -5.80  | 4.86E-06 | tRNA (guanine-N1)-methyltransferase       |
| PA3744 | <i>rimM</i> | -5.16  | 0.0002   | 16S rRNA processing protein               |
| PA3745 | <i>rpsP</i> | -5.53  | 1.06E-05 | 30S ribosomal protein S16                 |
| PA3746 | <i>ffh</i>  | -2.78  | 0.0034   | signal recognition particle protein Ffh   |
| PA3762 |             | 3.78   | 0.0012   | hypothetical protein                      |
| PA3768 |             | -2.01  | 0.0027   | probable metallo-oxidoreductase           |
| PA3769 | <i>guaA</i> | -4.21  | 0.0004   | GMP synthase                              |
| PA3770 | <i>guaB</i> | -3.21  | 0.0002   | inosine-5'-monophosphate dehydrogenase    |
| PA3792 | <i>leuA</i> | -2.30  | 4.40E-05 | 2-isopropylmalate synthase                |
| PA3795 |             | 2.25   | 0.0015   | probable oxidoreductase                   |
| PA3806 |             | -2.08  | 0.0053   | conserved hypothetical protein            |
| PA3807 | <i>ndk</i>  | -2.14  | 0.0001   | nucleoside diphosphate kinase             |
| PA3809 | <i>fdx2</i> | -2.22  | 0.0002   | ferredoxin [2Fe-2S]                       |
| PA3810 | <i>hscA</i> | -2.98  | 5.28E-05 | heat shock protein HscA                   |
| PA3811 | <i>hscB</i> | -2.33  | 9.39E-05 | heat shock protein HscB                   |
| PA3812 | <i>iscA</i> | -2.29  | 0.0003   | probable iron-binding protein IscA        |
| PA3815 |             | -2.13  | 0.0016   | conserved hypothetical protein            |
| PA3818 |             | -3.39  | 1.20E-05 | extragenic suppressor protein SuhB        |
| PA3819 |             | 6.15   | 6.79E-06 | conserved hypothetical protein            |
| PA3820 | <i>secF</i> | -4.36  | 0.0002   | secretion protein SecF                    |
| PA3821 | <i>secD</i> | -2.88  | 2.01E-05 | secretion protein SecD                    |
| PA3822 |             | -2.90  | 0.0002   | conserved hypothetical protein            |

|        |             |        |          |                                                                                       |
|--------|-------------|--------|----------|---------------------------------------------------------------------------------------|
| PA3823 | <i>tgt</i>  | -2.21  | 0.0003   | queuine tRNA-ribosyltransferase<br>S-adenosylmethionine:tRNA ribosyltransferase-      |
| PA3824 | <i>queA</i> | -2.15  | 0.0038   | isomerase                                                                             |
| PA3836 |             | -3.38  | 5.36E-05 | hypothetical protein                                                                  |
| PA3837 |             | -2.51  | 0.0006   | probable permease of ABC transporter                                                  |
| PA3851 |             | 2.55   | 0.0001   | hypothetical protein                                                                  |
| PA3852 |             | 3.32   | 4.86E-05 | hypothetical protein<br>probable ATP-binding component of ABC                         |
| PA3891 |             | 2.05   | 0.0006   | transporter                                                                           |
| PA3903 | <i>prfC</i> | -2.28  | 0.0003   | peptide chain release factor 3                                                        |
| PA3909 |             | 143.98 | 2.89E-08 | hypothetical protein                                                                  |
| PA3910 |             | 34.61  | 3.25E-07 | hypothetical protein                                                                  |
| PA3916 | <i>moaE</i> | 3.18   | 0.0011   | molybdopterin converting factor, large subunit                                        |
| PA3917 | <i>moaD</i> | 2.77   | 0.0106   | molybdopterin converting factor, small subunit                                        |
| PA3918 | <i>moaC</i> | 2.09   | 0.0043   | molybdopterin biosynthetic protein C                                                  |
| PA3919 |             | 8.47   | 0.0002   | conserved hypothetical protein                                                        |
| PA3924 |             | 2.03   | 0.0004   | probable medium-chain acyl-CoA ligase                                                 |
| PA3928 |             | 3.38   | 0.0004   | hypothetical protein                                                                  |
| PA3929 | <i>cioB</i> | 2.11   | 0.0004   | cyanide insensitive terminal oxidase                                                  |
| PA3931 |             | -2.61  | 3.46E-05 | conserved hypothetical protein                                                        |
| PA3936 |             | -3.29  | 0.003    | probable permease of ABC taurine transporter<br>probable ATP-binding component of ABC |
| PA3937 |             | -2.52  | 0.0002   | taurine transporter<br>probable periplasmic taurine-binding protein                   |
| PA3938 |             | -3.14  | 0.0002   | precursor                                                                             |
| PA3943 |             | 2.63   | 0.003    | conserved hypothetical protein                                                        |
| PA3944 |             | 2.03   | 0.0006   | conserved hypothetical protein                                                        |
| PA3945 |             | 5.72   | 0.0003   | conserved hypothetical protein                                                        |
| PA3962 |             | 2.03   | 0.0082   | hypothetical protein                                                                  |
| PA3980 |             | -2.77  | 3.88E-05 | conserved hypothetical protein                                                        |
| PA3986 |             | 5.69   | 0.0005   | hypothetical protein                                                                  |
| PA3989 | <i>holA</i> | -2.03  | 0.0003   | DNA polymerase III, delta subunit<br>nicotinic acid mononucleotide                    |
| PA4006 | <i>nadD</i> | -3.10  | 0.0043   | adenylyltransferase                                                                   |
| PA4021 |             | -2.08  | 0.0098   | probable transcriptional regulator                                                    |
| PA4026 |             | 2.33   | 0.0003   | probable acetyltransferase                                                            |
| PA4027 |             | 2.07   | 0.0007   | hypothetical protein                                                                  |
| PA4029 |             | -3.25  | 0.001    | conserved hypothetical protein                                                        |
| PA4042 | <i>xseB</i> | -2.82  | 0.0439   | exodeoxyribonuclease VII small subunit                                                |
| PA4051 | <i>thiL</i> | -2.47  | 1.34E-05 | thiamine monophosphate kinase                                                         |
| PA4052 | <i>nusB</i> | -2.19  | 0.0001   | NusB protein                                                                          |
| PA4053 | <i>ribE</i> | -2.12  | 0.0002   | 6,7-dimethyl-8-ribityllumazine synthase                                               |
| PA4055 | <i>ribC</i> | -2.27  | 0.003    | riboflavin synthase alpha chain                                                       |
| PA4104 |             | 2.08   | 0.005    | conserved hypothetical protein                                                        |
| PA4108 |             | 2.08   | 0.0039   | hypothetical protein                                                                  |
| PA4112 |             | 2.67   | 0.0015   | probable sensor/response regulator hybrid                                             |

|        |              |        |          |                                               |
|--------|--------------|--------|----------|-----------------------------------------------|
| PA4139 |              | 3.83   | 0.0414   | hypothetical protein                          |
| PA4140 |              | 2.00   | 0.0422   | hypothetical protein                          |
| PA4141 |              | 2.35   | 0.0044   | hypothetical protein                          |
| PA4142 |              | 2.06   | 0.0401   | probable secretion protein                    |
| PA4164 |              | -2.17  | 0.0101   | hypothetical protein                          |
| PA4190 | <i>pqsL</i>  | 2.60   | 3.82E-05 | probable FAD-dependent monooxygenase          |
| PA4191 |              | -2.06  | 0.0059   | probable iron/ascorbate oxidoreductase        |
| PA4209 | <i>phzM</i>  | 7.15   | 0.0235   | probable phenazine-specific methyltransferase |
| PA4210 | <i>phzA1</i> | 2.46   | 0.0069   | probable phenazine biosynthesis protein       |
| PA4211 | <i>phzB1</i> | 55.07  | 0.0016   | probable phenazine biosynthesis protein       |
| PA4217 | <i>phzS</i>  | 29.57  | 0.0012   | flavin-containing monooxygenase               |
| PA4237 | <i>rplQ</i>  | -5.44  | 0.0005   | 50S ribosomal protein L17                     |
| PA4238 | <i>rpoA</i>  | -9.60  | 1.28E-05 | DNA-directed RNA polymerase alpha chain       |
| PA4239 | <i>rpsD</i>  | -9.74  | 1.04E-05 | 30S ribosomal protein S4                      |
| PA4240 | <i>rpsK</i>  | -4.41  | 0.0003   | 30S ribosomal protein S11                     |
| PA4241 | <i>rpsM</i>  | -13.04 | 7.78E-07 | 30S ribosomal protein S13                     |
| PA4242 | <i>rpmJ</i>  | -2.35  | 0.0004   | 50S ribosomal protein L36                     |
| PA4243 | <i>secY</i>  | -11.17 | 1.02E-05 | secretion protein SecY                        |
| PA4244 | <i>rplO</i>  | -4.22  | 9.56E-05 | 50S ribosomal protein L15                     |
| PA4245 | <i>rpmD</i>  | -4.12  | 1.44E-05 | 50S ribosomal protein L30                     |
| PA4246 | <i>rpsE</i>  | -4.74  | 8.38E-05 | 30S ribosomal protein S5                      |
| PA4247 | <i>rplR</i>  | -12.49 | 1.36E-05 | 50S ribosomal protein L18                     |
| PA4248 | <i>rplF</i>  | -7.77  | 9.55E-05 | 50S ribosomal protein L6                      |
| PA4249 | <i>rpsH</i>  | -5.66  | 3.04E-05 | 30S ribosomal protein S8                      |
| PA4250 | <i>rpsN</i>  | -17.29 | 7.98E-06 | 30S ribosomal protein S14                     |
| PA4251 | <i>rplE</i>  | -9.91  | 0.0093   | 50S ribosomal protein L5                      |
| PA4252 | <i>rplX</i>  | -10.99 | 5.03E-07 | 50S ribosomal protein L24                     |
| PA4253 | <i>rplN</i>  | -14.28 | 1.65E-08 | 50S ribosomal protein L14                     |
| PA4254 | <i>rpsQ</i>  | -11.34 | 2.35E-07 | 30S ribosomal protein S17                     |
| PA4255 | <i>rpmC</i>  | -7.26  | 2.06E-07 | 50S ribosomal protein L29                     |
| PA4256 | <i>rplP</i>  | -21.72 | 4.22E-08 | 50S ribosomal protein L16                     |
| PA4257 | <i>rpsC</i>  | -16.99 | 1.69E-05 | 30S ribosomal protein S3                      |
| PA4258 | <i>rplV</i>  | -12.59 | 1.31E-05 | 50S ribosomal protein L22                     |
| PA4259 | <i>rpsS</i>  | -8.06  | 7.18E-05 | 30S ribosomal protein S19                     |
| PA4260 | <i>rplB</i>  | -14.39 | 1.32E-05 | 50S ribosomal protein L2                      |
| PA4261 | <i>rplW</i>  | -15.06 | 0.0048   | 50S ribosomal protein L23                     |
| PA4262 | <i>rplD</i>  | -11.66 | 1.85E-05 | 50S ribosomal protein L4                      |
| PA4263 | <i>rplC</i>  | -8.92  | 6.39E-07 | 50S ribosomal protein L3                      |
| PA4264 | <i>rpsJ</i>  | -9.32  | 8.10E-07 | 30S ribosomal protein S10                     |
| PA4269 | <i>rpoC</i>  | -7.91  | 8.10E-05 | DNA-directed RNA polymerase beta* chain       |
| PA4270 | <i>rpoB</i>  | -4.29  | 7.76E-05 | DNA-directed RNA polymerase beta chain        |
| PA4271 | <i>rplL</i>  | -7.53  | 2.08E-07 | 50S ribosomal protein L7 / L12                |
| PA4272 | <i>rplJ</i>  | -15.08 | 7.90E-06 | 50S ribosomal protein L10                     |
| PA4273 | <i>rplA</i>  | -12.12 | 2.40E-06 | 50S ribosomal protein L1                      |
| PA4274 | <i>rplK</i>  | -9.49  | 9.35E-05 | 50S ribosomal protein L11                     |
| PA4275 | <i>nusG</i>  | -3.30  | 7.22E-05 | transcription antitermination protein NusG    |

|        |              |       |          |                                                                     |
|--------|--------------|-------|----------|---------------------------------------------------------------------|
| PA4276 | <i>secE</i>  | -3.89 | 9.15E-06 | secretion protein SecE                                              |
| PA4289 |              | 2.06  | 0.0018   | probable transporter                                                |
| PA4290 |              | 3.00  | 0.0094   | probable chemotaxis transducer                                      |
| PA4292 |              | -3.61 | 9.72E-05 | probable phosphate transporter                                      |
| PA4296 |              | 3.30  | 0.003    | probable two-component response regulator                           |
| PA4298 |              | 3.32  | 0.0002   | hypothetical protein                                                |
| PA4299 |              | 4.07  | 1.42E-05 | hypothetical protein                                                |
| PA4300 |              | 2.96  | 0.0002   | hypothetical protein                                                |
| PA4302 |              | 2.66  | 0.0002   | probable type II secretion system protein                           |
| PA4303 |              | 2.19  | 0.0013   | hypothetical protein                                                |
| PA4305 |              | 2.57  | 0.003    | hypothetical protein                                                |
| PA4306 |              | 3.27  | 0.0318   | hypothetical protein                                                |
| PA4311 |              | 2.96  | 9.43E-05 | conserved hypothetical protein                                      |
| PA4312 |              | 4.31  | 0.0003   | conserved hypothetical protein                                      |
| PA4314 | <i>purU1</i> | -2.53 | 0.0003   | formyltetrahydrofolate deformylase                                  |
| PA4350 | <i>olsB</i>  | 28.97 | 2.20E-07 | conserved hypothetical protein                                      |
| PA4351 | <i>olsA</i>  | 18.72 | 2.24E-08 | probable acyltransferase                                            |
| PA4357 |              | -2.09 | 0.0032   | conserved hypothetical protein                                      |
| PA4358 |              | -2.46 | 0.0005   | probable ferrous iron transport protein                             |
| PA4359 |              | -2.17 | 0.0147   | conserved hypothetical protein                                      |
| PA4370 | <i>icmP</i>  | -4.21 | 0.0005   | Insulin-cleaving metalloproteinase outer membrane protein precursor |
| PA4373 |              | -2.16 | 0.0016   | hypothetical protein                                                |
| PA4377 |              | 2.62  | 0.0005   | hypothetical protein                                                |
| PA4378 | <i>inaA</i>  | 2.35  | 0.0004   | InaA protein                                                        |
| PA4428 | <i>sspA</i>  | -2.01 | 0.0016   | stringent starvation protein A                                      |
| PA4429 |              | -3.76 | 0.0001   | probable cytochrome c1 precursor                                    |
| PA4431 |              | -3.42 | 0.0001   | probable iron-sulfur protein                                        |
| PA4432 | <i>rpsI</i>  | -5.96 | 1.86E-05 | 30S ribosomal protein S9                                            |
| PA4433 | <i>rplM</i>  | -4.99 | 4.35E-05 | 50S ribosomal protein L13                                           |
| PA4442 | <i>cysN</i>  | -3.89 | 0.0002   | ATP sulfurylase GTP-binding subunit/APS kinase                      |
| PA4443 | <i>cysD</i>  | -4.87 | 7.28E-05 | ATP sulfurylase small subunit                                       |
| PA4448 | <i>hisD</i>  | -2.12 | 0.0054   | histidinol dehydrogenase                                            |
| PA4449 | <i>hisG</i>  | -2.31 | 0.0173   | ATP-phosphoribosyltransferase                                       |
| PA4472 | <i>pmbA</i>  | 2.04  | 0.0319   | PmbA protein                                                        |
| PA4480 | <i>mreC</i>  | -2.64 | 0.001    | rod shape-determining protein MreC                                  |
| PA4481 | <i>mreB</i>  | -3.71 | 3.61E-05 | rod shape-determining protein MreB                                  |
| PA4482 | <i>gatC</i>  | -2.82 | 7.05E-05 | Glu-tRNA(Gln) amidotransferase subunit C                            |
| PA4483 | <i>gatA</i>  | -3.97 | 0.0019   | Glu-tRNA(Gln) amidotransferase subunit A                            |
| PA4488 |              | 3.11  | 0.0139   | conserved hypothetical protein                                      |
| PA4495 |              | 2.36  | 0.0014   | hypothetical protein                                                |
| PA4498 |              | -2.01 | 0.042    | probable metalloproteinase                                          |
| PA4500 |              | -4.58 | 0.001    | probable binding protein component of ABC transporter               |
| PA4517 |              | -2.09 | 0.0004   | conserved hypothetical protein                                      |

|        |              |        |          |                                             |
|--------|--------------|--------|----------|---------------------------------------------|
| PA4531 |              | -2.14  | 0.0412   | hypothetical protein                        |
| PA4551 | <i>pilV</i>  | 2.41   | 0.009    | type 4 fimbrial biogenesis protein PilV     |
| PA4555 | <i>pilY2</i> | 2.03   | 0.0126   | type 4 fimbrial biogenesis protein PilY2    |
| PA4563 | <i>rpsT</i>  | -5.94  | 8.90E-06 | 30S ribosomal protein S20                   |
| PA4567 | <i>rpmA</i>  | -4.56  | 1.96E-05 | 50S ribosomal protein L27                   |
| PA4568 | <i>rplU</i>  | -9.15  | 4.74E-06 | 50S ribosomal protein L21                   |
| PA4572 | <i>fklB</i>  | -2.40  | 0.0001   | peptidyl-prolyl cis-trans isomerase FklB    |
| PA4577 |              | 2.13   | 0.0018   | hypothetical protein                        |
| PA4578 |              | -2.38  | 0.0002   | hypothetical protein                        |
| PA4588 | <i>gdhA</i>  | -2.95  | 0.0004   | glutamate dehydrogenase                     |
| PA4602 | <i>glyA3</i> | -2.76  | 0.0009   | serine hydroxymethyltransferase             |
| PA4607 |              | 9.30   | 6.04E-05 | hypothetical protein                        |
| PA4608 |              | 2.82   | 1.43E-05 | hypothetical protein                        |
| PA4614 | <i>mscL</i>  | 4.14   | 0.0001   | conductance mechanosensitive channel        |
| PA4669 | <i>ipk</i>   | -3.05  | 0.0001   | isopentenyl monophosphate kinase            |
| PA4670 | <i>prs</i>   | -4.30  | 6.81E-06 | ribose-phosphate pyrophosphokinase          |
| PA4671 |              | -11.84 | 1.48E-06 | probable ribosomal protein L25              |
| PA4672 |              | -2.86  | 0.001    | peptidyl-tRNA hydrolase                     |
| PA4675 |              | -4.26  | 4.81E-05 | probable TonB-dependent receptor            |
| PA4684 |              | -2.22  | 0.0001   | hypothetical protein                        |
| PA4688 | <i>hitB</i>  | -2.10  | 0.0004   | iron (III)-transport system permease HitB   |
| PA4694 | <i>ilvC</i>  | -2.14  | 0.0009   | ketol-acid reductoisomerase                 |
| PA4696 | <i>ilvI</i>  | -3.44  | 0.0013   | acetolactate synthase large subunit         |
| PA4702 |              | 2.21   | 0.0002   | hypothetical protein                        |
| PA4703 |              | 3.69   | 0.0044   | hypothetical protein                        |
| PA4717 |              | 2.89   | 2.90E-05 | conserved hypothetical protein              |
| PA4723 | <i>dksA</i>  | -3.45  | 2.53E-05 | suppressor protein DksA                     |
| PA4731 | <i>panD</i>  | -2.06  | 0.0001   | aspartate 1-decarboxylase precursor         |
| PA4738 |              | 2.19   | 0.0014   | conserved hypothetical protein              |
| PA4739 |              | 2.59   | 0.007    | conserved hypothetical protein              |
| PA4740 | <i>pnp</i>   | -7.56  | 1.26E-06 | polyribonucleotide nucleotidyltransferase   |
| PA4741 | <i>rpsO</i>  | -6.22  | 1.53E-05 | 30S ribosomal protein S15                   |
| PA4742 | <i>truB</i>  | -3.38  | 4.46E-05 | tRNA pseudouridine 55 synthase              |
| PA4743 | <i>rbfA</i>  | -3.51  | 3.82E-05 | ribosome-binding factor A                   |
| PA4744 | <i>infB</i>  | -2.99  | 0.0007   | translation initiation factor IF-2          |
| PA4745 | <i>nusA</i>  | -3.50  | 0.0001   | N utilization substance protein A           |
| PA4746 |              | -2.42  | 0.0002   | conserved hypothetical protein              |
| PA4747 | <i>secG</i>  | -3.29  | 7.90E-05 | secretion protein SecG                      |
| PA4748 | <i>tpiA</i>  | -3.39  | 6.78E-05 | triosephosphate isomerase                   |
| PA4754 |              | -2.26  | 0.0004   | hypothetical protein                        |
| PA4755 | <i>greA</i>  | -2.46  | 5.70E-05 | transcription elongation factor GreA        |
| PA4756 | <i>carB</i>  | -2.08  | 0.0006   | carbamoylphosphate synthetase large subunit |
| PA4768 | <i>smpB</i>  | -2.24  | 0.0006   | SmpB protein                                |
| PA4781 |              | 3.69   | 0.0016   | probable two-component response regulator   |
| PA4785 |              | 2.01   | 0.0005   | probable acyl-CoA thiolase                  |
| PA4839 | <i>speA</i>  | 3.12   | 3.14E-05 | biosynthetic arginine decarboxylase         |

|        |              |        |          |                                                                                 |
|--------|--------------|--------|----------|---------------------------------------------------------------------------------|
| PA4844 |              | 7.05   | 0.0001   | probable chemotaxis transducer                                                  |
| PA4846 | <i>aroQ1</i> | -2.48  | 0.0007   | 3-dehydroquinase dehydratase                                                    |
| PA4850 | <i>prmA</i>  | -2.06  | 0.0001   | ribosomal protein L11 methyltransferase                                         |
| PA4852 |              | -3.15  | 0.0001   | conserved hypothetical protein                                                  |
| PA4853 | <i>fis</i>   | -3.83  | 9.85E-05 | DNA-binding protein Fis<br>phosphoribosylaminoimidazolecarboxamide              |
| PA4854 | <i>purH</i>  | -2.56  | 1.98E-05 | formyltransferase                                                               |
| PA4855 | <i>purD</i>  | -4.36  | 1.88E-06 | phosphoribosylamine--glycine ligase                                             |
| PA4870 |              | 2.72   | 0.0009   | conserved hypothetical protein                                                  |
| PA4874 |              | 2.48   | 0.0003   | conserved hypothetical protein                                                  |
| PA4875 |              | 3.15   | 1.23E-05 | hypothetical protein                                                            |
| PA4876 | <i>osmE</i>  | 5.78   | 8.40E-06 | osmotically inducible lipoprotein OsmE                                          |
| PA4880 |              | 3.45   | 5.47E-05 | probable bacterioferritin                                                       |
| PA4882 |              | 2.62   | 0.0044   | hypothetical protein                                                            |
| PA4884 |              | 9.51   | 0.0009   | hypothetical protein                                                            |
| PA4888 |              | -3.13  | 9.79E-05 | conserved hypothetical protein                                                  |
| PA4889 |              | -2.66  | 0.0003   | probable oxidoreductase                                                         |
| PA4915 |              | 2.06   | 0.0016   | probable chemotaxis transducer                                                  |
| PA4918 |              | -2.51  | 9.70E-05 | hypothetical protein                                                            |
| PA4919 | <i>pncB1</i> | -3.12  | 0.0008   | nicotinate phosphoribosyltransferase                                            |
| PA4925 |              | 2.02   | 0.0005   | conserved hypothetical protein                                                  |
| PA4932 | <i>rplI</i>  | -8.62  | 1.44E-05 | 50S ribosomal protein L9                                                        |
| PA4933 |              | -10.99 | 1.38E-05 | hypothetical protein                                                            |
| PA4934 | <i>rpsR</i>  | -9.97  | 1.70E-06 | 30S ribosomal protein S18                                                       |
| PA4935 | <i>rpsF</i>  | -16.89 | 7.60E-06 | 30S ribosomal protein S6                                                        |
| PA4957 | <i>psd</i>   | -2.49  | 0.005    | phosphatidylserine decarboxylase                                                |
| PA5020 |              | -2.06  | 0.0177   | probable acyl-CoA dehydrogenase<br>probable major facilitator superfamily (MFS) |
| PA5030 |              | 2.40   | 0.0464   | transporter                                                                     |
| PA5034 | <i>hemE</i>  | -2.11  | 0.0002   | uroporphyrinogen decarboxylase                                                  |
| PA5035 | <i>gltD</i>  | -5.15  | 2.48E-05 | glutamate synthase small chain                                                  |
| PA5036 | <i>gltB</i>  | -2.29  | 0.0008   | glutamate synthase large chain precursor                                        |
| PA5046 |              | -6.99  | 1.73E-06 | malic enzyme                                                                    |
| PA5049 | <i>rpmE</i>  | -5.39  | 1.92E-06 | 50S ribosomal protein L31                                                       |
| PA5056 | <i>phaC1</i> | 3.12   | 0.0001   | poly(3-hydroxyalkanoic acid) synthase 1                                         |
| PA5057 | <i>phaD</i>  | 3.77   | 5.75E-05 | poly(3-hydroxyalkanoic acid) depolymerase                                       |
| PA5058 | <i>phaC2</i> | 4.79   | 1.15E-05 | poly(3-hydroxyalkanoic acid) synthase 2                                         |
| PA5059 |              | 2.50   | 0.0003   | probable transcriptional regulator                                              |
| PA5061 |              | 4.27   | 7.45E-05 | conserved hypothetical protein                                                  |
| PA5073 |              | 2.15   | 0.0017   | hypothetical protein<br>probable ATP-binding component of ABC                   |
| PA5074 |              | -2.01  | 0.0003   | transporter                                                                     |
| PA5092 | <i>hutI</i>  | 2.26   | 0.0003   | imidazolone-5-propionate hydrolase HutI                                         |
| PA5112 | <i>estA</i>  | -2.53  | 0.0046   | esterase EstA                                                                   |
| PA5118 | <i>thiI</i>  | -3.58  | 5.61E-06 | thiazole biosynthesis protein ThiI                                              |
| PA5125 | <i>ntrC</i>  | -2.33  | 0.0011   | two-component response regulator NtrC                                           |

|        |              |        |          |                                                                                                                          |
|--------|--------------|--------|----------|--------------------------------------------------------------------------------------------------------------------------|
| PA5137 |              | -3.35  | 0.0002   | hypothetical protein                                                                                                     |
| PA5138 |              | -2.69  | 0.0004   | hypothetical protein                                                                                                     |
| PA5142 | <i>hisH1</i> | -2.38  | 0.0008   | glutamine amidotransferase                                                                                               |
| PA5143 | <i>hisB</i>  | -2.40  | 8.49E-05 | imidazoleglycerol-phosphate dehydratase<br>probable ATP-binding component of ABC<br>transporter                          |
| PA5152 |              | -2.24  | 6.61E-05 | transporter                                                                                                              |
| PA5153 |              | -3.36  | 0.0022   | probable periplasmic binding protein                                                                                     |
| PA5154 |              | -2.76  | 0.0174   | probable permease of ABC transporter                                                                                     |
| PA5155 |              | -2.42  | 0.0009   | probable permease of ABC transporter                                                                                     |
| PA5167 |              | -3.48  | 0.0022   | probable c4-dicarboxylate-binding protein                                                                                |
| PA5168 |              | -4.17  | 0.0016   | probable dicarboxylate transporter                                                                                       |
| PA5169 |              | -8.52  | 0.0014   | probable C4-dicarboxylate transporter                                                                                    |
| PA5174 |              | -3.27  | 4.49E-05 | probable beta-ketoacyl synthase                                                                                          |
| PA5178 |              | 12.66  | 4.43E-08 | conserved hypothetical protein                                                                                           |
| PA5182 |              | 2.22   | 0.0002   | hypothetical protein                                                                                                     |
| PA5201 |              | -2.87  | 1.94E-05 | conserved hypothetical protein                                                                                           |
| PA5202 |              | -2.06  | 0.0011   | hypothetical protein                                                                                                     |
| PA5212 |              | 3.98   | 3.87E-06 | hypothetical protein                                                                                                     |
| PA5213 | <i>gcvP1</i> | 2.30   | 0.0072   | glycine cleavage system protein P1                                                                                       |
| PA5244 |              | -2.26  | 0.0049   | conserved hypothetical protein<br>probable ATP-binding component of ABC<br>transporter                                   |
| PA5252 |              | -2.05  | 0.0004   | transporter                                                                                                              |
| PA5261 | <i>algR</i>  | 2.37   | 7.92E-05 | alginate biosynthesis regulatory protein AlgR                                                                            |
| PA5271 |              | 3.08   | 3.42E-05 | hypothetical protein                                                                                                     |
| PA5285 |              | 2.53   | 0.0012   | hypothetical protein                                                                                                     |
| PA5296 | <i>rep</i>   | -2.10  | 0.0001   | ATP-dependent DNA helicase Rep                                                                                           |
| PA5297 | <i>poxB</i>  | 6.39   | 2.78E-05 | pyruvate dehydrogenase (cytochrome)                                                                                      |
| PA5305 |              | 3.23   | 8.55E-05 | conserved hypothetical protein                                                                                           |
| PA5306 |              | 4.26   | 1.96E-06 | conserved hypothetical protein                                                                                           |
| PA5315 | <i>rpmG</i>  | -2.72  | 0.0004   | 50S ribosomal protein L33                                                                                                |
| PA5316 | <i>rpmB</i>  | -3.40  | 0.0002   | 50S ribosomal protein L28                                                                                                |
| PA5335 |              | -2.14  | 0.0007   | conserved hypothetical protein                                                                                           |
| PA5340 |              | -2.17  | 0.0196   | hypothetical protein                                                                                                     |
| PA5351 | <i>rubA1</i> | -3.16  | 7.10E-05 | Rubredoxin 1                                                                                                             |
| PA5357 |              | -2.05  | 0.0038   | hypothetical protein                                                                                                     |
| PA5360 | <i>phoB</i>  | 16.05  | 5.40E-07 | two-component response regulator PhoB                                                                                    |
| PA5361 | <i>phoR</i>  | 9.27   | 5.35E-05 | two-component sensor PhoR                                                                                                |
| PA5365 | <i>phoU</i>  | 18.66  | 9.50E-09 | phosphate uptake regulatory protein PhoU<br>ATP-binding component of ABC phosphate<br>transporter                        |
| PA5366 | <i>pstB</i>  | 19.02  | 2.21E-08 | transporter                                                                                                              |
| PA5367 | <i>pstA</i>  | 25.70  | 7.40E-09 | membrane protein component of ABC phosphate<br>transporter<br>membrane protein component of ABC phosphate<br>transporter |
| PA5368 | <i>pstC</i>  | 27.67  | 3.90E-09 | transporter                                                                                                              |
| PA5369 |              | 223.30 | 2.60E-09 | hypothetical protein                                                                                                     |
| PA5380 |              | -4.58  | 0.0037   | probable transcriptional regulator                                                                                       |

|        |             |        |          |                                                                                       |
|--------|-------------|--------|----------|---------------------------------------------------------------------------------------|
| PA5419 | <i>soxG</i> | 2.06   | 0.0374   | sarcosine oxidase gamma subunit                                                       |
| PA5424 |             | 3.30   | 0.0001   | conserved hypothetical protein                                                        |
| PA5425 | <i>purK</i> | -2.39  | 3.87E-05 | phosphoribosylaminoimidazole carboxylase<br>phosphoribosylaminoimidazole carboxylase, |
| PA5426 | <i>purE</i> | -2.56  | 2.19E-05 | catalytic subunit                                                                     |
| PA5429 | <i>aspA</i> | -2.08  | 0.0009   | aspartate ammonia-lyase                                                               |
| PA5439 |             | 2.03   | 0.0005   | probable glucose-6-phosphate dehydrogenase                                            |
| PA5440 |             | -2.97  | 5.29E-06 | probable peptidase                                                                    |
| PA5446 |             | 2.25   | 0.0103   | hypothetical protein                                                                  |
| PA5460 |             | 2.33   | 0.0003   | hypothetical protein                                                                  |
| PA5470 |             | -2.38  | 0.0004   | probable peptide chain release factor                                                 |
| PA5474 |             | 2.09   | 0.0043   | probable metalloprotease                                                              |
| PA5475 |             | 2.67   | 4.79E-05 | hypothetical protein                                                                  |
| PA5479 | <i>gltP</i> | -2.41  | 0.0002   | proton-glutamate symporter                                                            |
| PA5497 |             | -2.03  | 0.001    | hypothetical protein                                                                  |
| PA5504 |             | -2.85  | 0.0004   | probable permease of ABC transporter                                                  |
| PA5521 |             | 4.68   | 0.0001   | probable short-chain dehydrogenase                                                    |
| PA5522 |             | 2.88   | 0.0001   | probable glutamine synthetase                                                         |
| PA5523 |             | 2.91   | 0.0056   | probable aminotransferase                                                             |
| PA5527 |             | 2.04   | 0.0001   | hypothetical protein                                                                  |
| PA5530 |             | -5.72  | 1.49E-05 | probable MFS dicarboxylate transporter                                                |
| PA5546 |             | 5.74   | 2.52E-06 | conserved hypothetical protein                                                        |
| PA5553 | <i>atpC</i> | -2.78  | 0.0006   | ATP synthase epsilon chain                                                            |
| PA5554 | <i>atpD</i> | -10.62 | 7.81E-06 | ATP synthase beta chain                                                               |
| PA5555 | <i>atpG</i> | -8.91  | 0.0002   | ATP synthase gamma chain                                                              |
| PA5556 | <i>atpA</i> | -2.50  | 0.0037   | ATP synthase alpha chain                                                              |
| PA5557 | <i>atpH</i> | -4.17  | 0.0002   | ATP synthase delta chain                                                              |
| PA5558 | <i>atpF</i> | -6.83  | 1.85E-05 | ATP synthase B chain                                                                  |
| PA5559 | <i>atpE</i> | -4.35  | 0.0029   | atp synthase C chain                                                                  |
| PA5560 | <i>atpB</i> | -2.95  | 2.83E-05 | ATP synthase A chain                                                                  |
| PA5561 | <i>atpI</i> | -2.11  | 0.0001   | ATP synthase protein I                                                                |
| PA5568 |             | -2.28  | 0.0028   | conserved hypothetical protein                                                        |
| PA5569 | <i>rnpA</i> | -5.87  | 9.53E-05 | ribonuclease P protein component                                                      |
| PA5570 | <i>rpmH</i> | -4.55  | 0.0003   | 50S ribosomal protein L34                                                             |
